# Supplementary material
Source: Elsevier journal article supplement (https://comptes-rendus.academie-sciences.fr/chimie/article/10.1016/j.crci.2012.09.001/file/attach/mmc1.pdf)
Supplement: mmc1 [file mmc1.pdf]

Online Supplementary Material for:

**Influence of sterically non-hindering methyl groups on adsorption  
properties of two classical zinc and copper MOF types**

Ishtvan Boldog<sup>a</sup>, Lei Xing<sup>a</sup>, Axel Schulz<sup>b</sup>, Christoph Janiak<sup>a,\*</sup>

<sup>a</sup> Institut für Anorganische Chemie und Strukturchemie, Universität Düsseldorf,  
Universitätsstr. 1, D-40225 Düsseldorf, Germany

<sup>b</sup> Institut für Chemie, Abteilung Anorganische Chemie, Universität Rostock, Albert-Einstein-  
Str. 3a, D-18059 Rostock, Germany

**Table S1** MOFs with known structure based on 4,4'-biphenyldicarboxylates with at least one non-H *meta*-substituent, with a condition that the substituent should not be a carboxylate group and that no bonds between the substituents are allowed.<sup>a</sup>

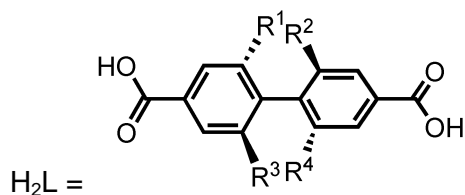

| R <sup>1</sup> , R <sup>2</sup> , R <sup>3</sup> , R <sup>4</sup>                                     | Comment                                                                                                                                                                                                                                                 | Reported properties or transformations                                                                                                      | Ref.<br>Doi (dx.doi.org/...)                                                                                                                                                                                                                                                                                                                                                               |
|-------------------------------------------------------------------------------------------------------|---------------------------------------------------------------------------------------------------------------------------------------------------------------------------------------------------------------------------------------------------------|---------------------------------------------------------------------------------------------------------------------------------------------|--------------------------------------------------------------------------------------------------------------------------------------------------------------------------------------------------------------------------------------------------------------------------------------------------------------------------------------------------------------------------------------------|
| NO <sub>2</sub> , NO <sub>2</sub> , H, H                                                              | 3D mixed ligand (with 1,3-dipyrid-4-yl-propane) coordination polymers of Mn, Co, Ni, Cd<br><br>[ML(phen)],<br>M = Co, Ni, Zn, 3D mixed ligand MOFs<br><br>3D mixed ligand (with 1,3-diimidazol-4-ylalkanes) coordination polymers of Mn, Co, Cu, Zn, Cd | Magnetism<br><br>Magnetism<br><br>Magnetism                                                                                                 | B. Li, G. Li, D. Liu, Y. Peng, X. Zhou, J. Hua, Z. Shi, S. Feng, CrystEngComm 13 (2011) 1291-1298.<br>10.1039/c0ce00252f<br><br>J.-Y. Zhang, Y. Ma, A.-L. Cheng, Q. Yue, Q. Sun, E.-Q. Gao, Dalton Trans. 40 (2011) 7219–7227.<br>10.1039/c1dt10158g<br><br>B. Li, X. Zhou, Q. Zhou, G. Li, J. Hua, Y. Bi, Y. Li, Z. Shi, S. Feng, CrystEngComm 13 (2011) 4592-4598.<br>10.1039/c1ce05061c |
| 2-NHR, H, H, H<br>R = H, COOtBu                                                                       | Non-interpenetrated [Zn <sub>4</sub> OL <sub>3</sub> ] IRMOF                                                                                                                                                                                            | Postsynthetic modification by thermally induced cleavage of Boc protecting group                                                            | R. K. Deshpande, J. L. Minnaar, S. G. Telfer, Angew. Chem. Int. Ed. 49 (2010) 4598-4602.<br>10.1002/anie.200905960                                                                                                                                                                                                                                                                         |
| Me, Me, OH, OH                                                                                        | Non-interpenetrated [Cu <sub>2</sub> L <sub>2</sub> ] · Guest, <b>nbo</b> network                                                                                                                                                                       | Catalytic enantioselective carbonyl-ene and Diels-Alder reactions (removal of guest without framework collapse molecules was not achieved ) | K. S. Jeong, Y. B. Go, S. M. Shin, S. J. Lee, J. Kim, O. M. Yaghi, N. Jeong, Chem. Sci. 2 (2011) 877-882.<br>10.1039/c0sc00582g                                                                                                                                                                                                                                                            |
| R, H, H, H<br>R = CHO, C=N-NH-2,4-C <sub>6</sub> H <sub>4</sub> (NO <sub>2</sub> ) <sub>2</sub> , OMe | Doubly-interpenetrated [Zn <sub>4</sub> OL <sub>3</sub> ] IRMOF                                                                                                                                                                                         | Postsynthetic modification (hydrazone formation) and mixed ligand IRMOFs. Interpenetration control                                          | A. D. Burrows, C. G. Frost, M. F. Mahon and C. Richardson, Angew. Chem. Int. Ed. 47 (2008) 8482-8486.<br>10.1002/anie.200802908                                                                                                                                                                                                                                                            |
| Me, Me, Me, Me                                                                                        | Non- and doubly interpenetrated [Zn <sub>4</sub> OL <sub>3-x</sub> L <sub>x</sub> <sup>2-x</sup> ] IRMOF                                                                                                                                                | Mixed ligand IRMOFs, interpenetration control                                                                                               | T.-H. Park, K. Koh, A. G. Wong-Foy, A. J. Matzger, Cryst. Growth Des. 11 (2011) 2059-2063.<br>10.1021/cg200271e                                                                                                                                                                                                                                                                            |

|                                                                             |                                                                    |                                                                                             |                                                                                                                                          |
|-----------------------------------------------------------------------------|--------------------------------------------------------------------|---------------------------------------------------------------------------------------------|------------------------------------------------------------------------------------------------------------------------------------------|
| CN, CN, H, H<br>Me, Me, H, H<br>I, I, H, H                                  | [Cu <sub>2</sub> L <sub>2</sub> ] · Guest, NbO<br>network          | Demonstration of<br>network design<br>possibilities,<br><br>Selective adsorption<br>studies | H. Furukawa, J. Kim, N. W.<br>Ockwig, M. O’Keeffe, O. M. Yaghi,<br>J. Am. Chem. Soc. 130 (2008)<br>11650-11661.<br><br>10.1021/ja803783c |
| CH <sub>2</sub> SMe, H, H, H<br>CH <sub>2</sub> SO <sub>2</sub> Me, H, H, H | Doubly-interpenetrated<br>[Zn <sub>4</sub> OL <sub>3</sub> ] IRMOF | Postsynthetic<br>modification of<br>(sulfide to sulfone).                                   | A. D. Burrows, C. G. Frost, M. F.<br>Mahon and C. Richardson, Chem.<br>Commun. (2009) 4218-4220.<br><br>10.1039/b906170c                 |

<sup>a</sup> Cambridge Structure Database search, version 5.33, November 2011. Not shown in the Table are the cases, when R= COOH, or an R-R linkage is present.

## Synthesis

2,2',6,6'-tetramethyl-4,4'-biphenyldicarboxylic acid, H<sub>2</sub>Me<sub>4</sub>BPDC, **1**:

*IBD220\_10h, the crude product after washings and drying on air, in DMSO-d<sub>6</sub>*

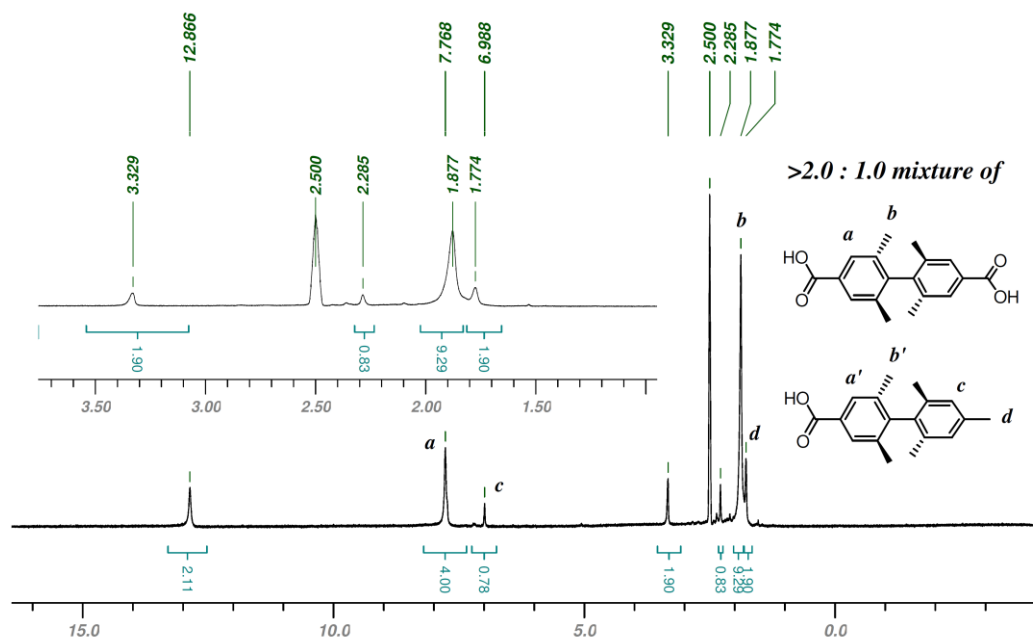

**2,2',6,6'-tetramethyl-4,4'-biphenylcarboxylic acid in DMSO-d<sub>6</sub>**

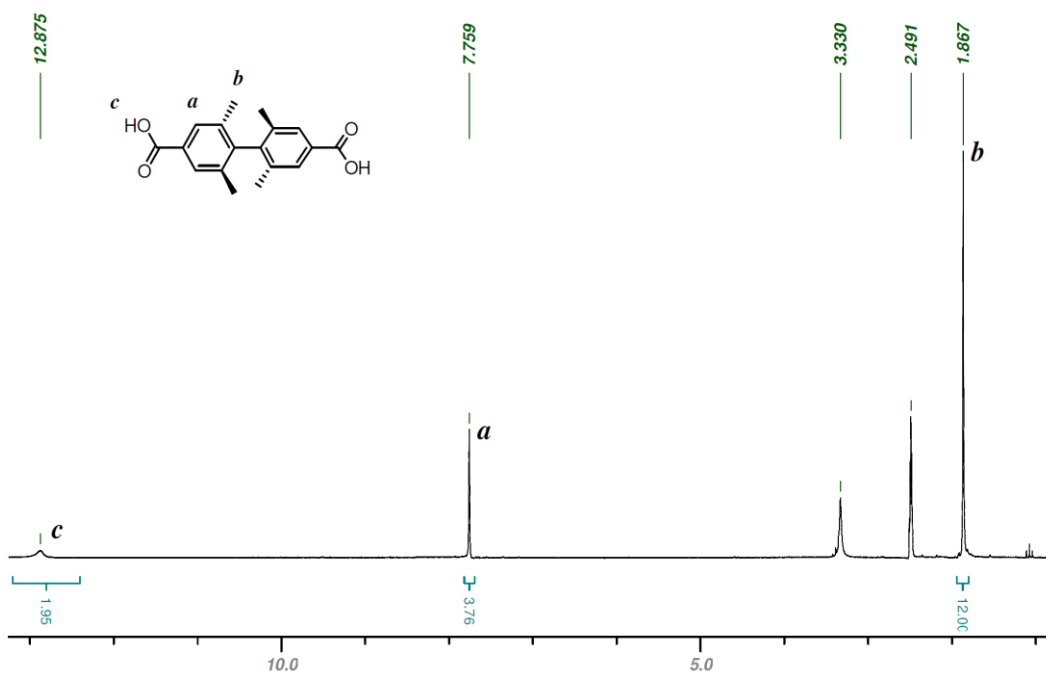

**Fig. S1** <sup>1</sup>H NMR spectra of the crude reaction mixture of H<sub>2</sub>Me<sub>4</sub>BPDC and 4-(2,4,6-trimethylphenyl)-3,5-dimethylphenylcarboxylic acid with a molar ratio of about 2.1:1.0 (above) and the pure H<sub>2</sub>Me<sub>4</sub>BPDC (below, crop from the first extraction).

## Thermogravimetric - differential thermal analysis (TG-DTA)

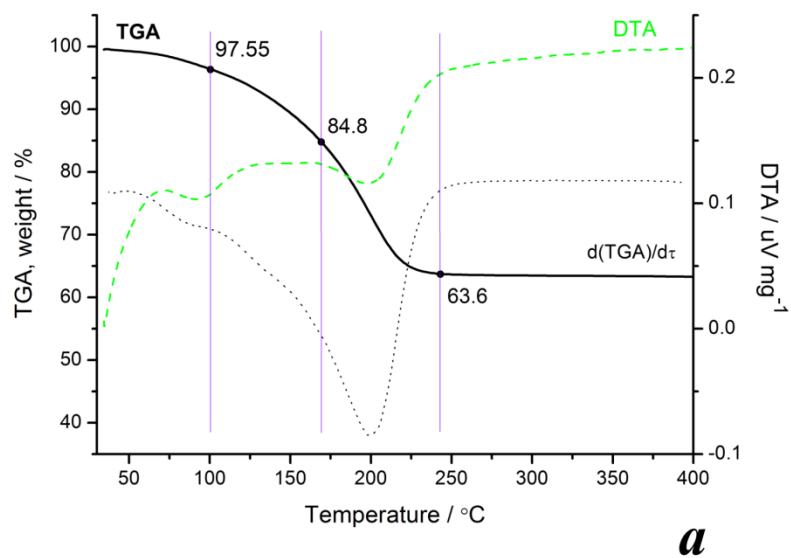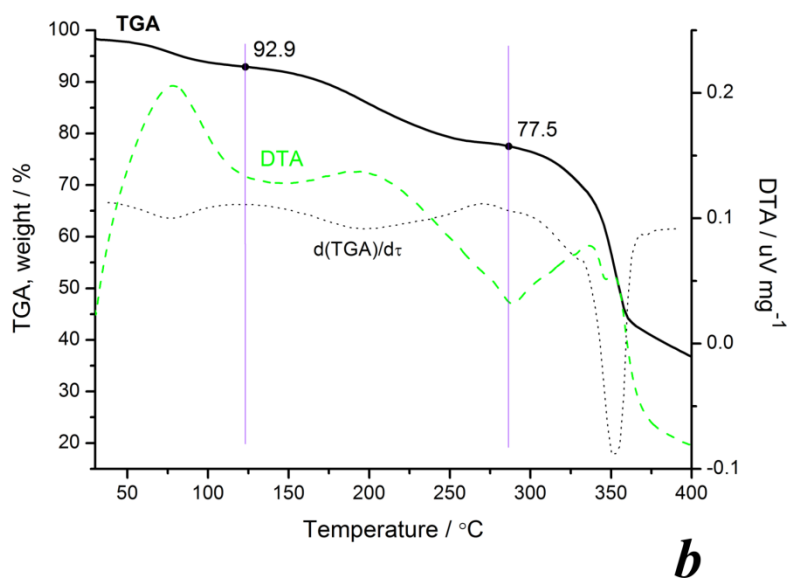

**Fig. S2** TG-DTA for **2** · 9 DMF (as synthesized) and **3** (after degassing of the partially solvent-exchanged **3** · 9 DMF)

## Infrared (IR) spectra

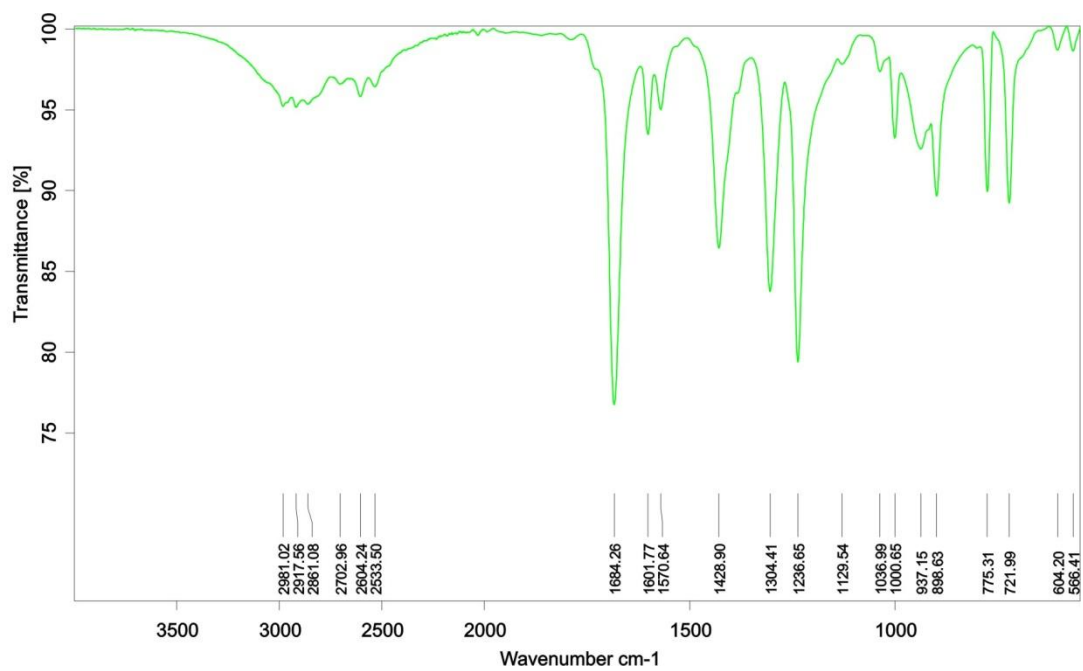

**Fig. S3** IR spectrum of H<sub>2</sub>Me<sub>4</sub>BPDC

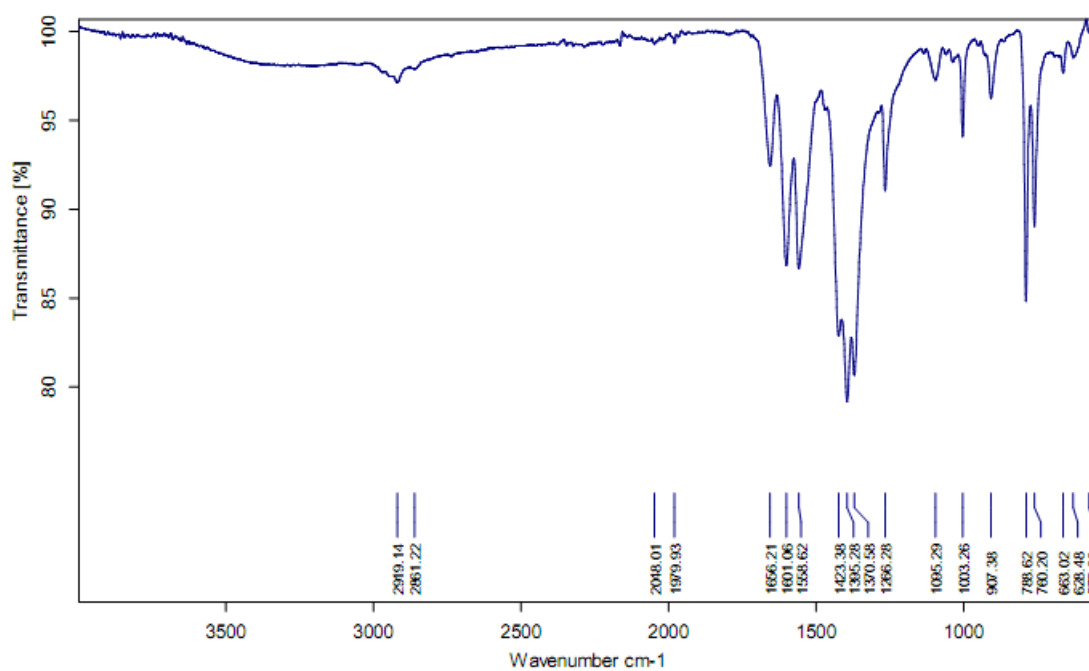

**Fig. S4** IR spectrum of  $[\text{Zn}_4\text{O}(\text{Me}_4\text{BPDC})_3] \cdot 9 \text{ DMF}, \mathbf{2} \cdot 9 \text{ DMF}$ , (as synthesized).

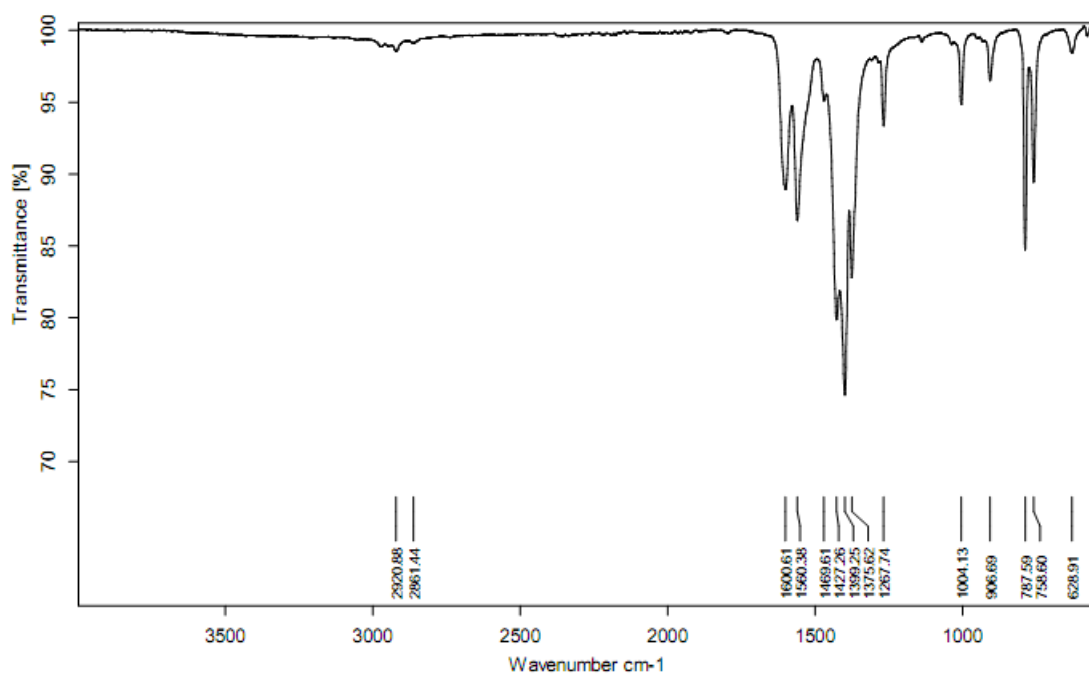

**Fig. S5** IR spectrum of  $[\text{Zn}_4\text{O}(\text{Me}_4\text{BPDC})_3], \mathbf{2}$  (degassed).

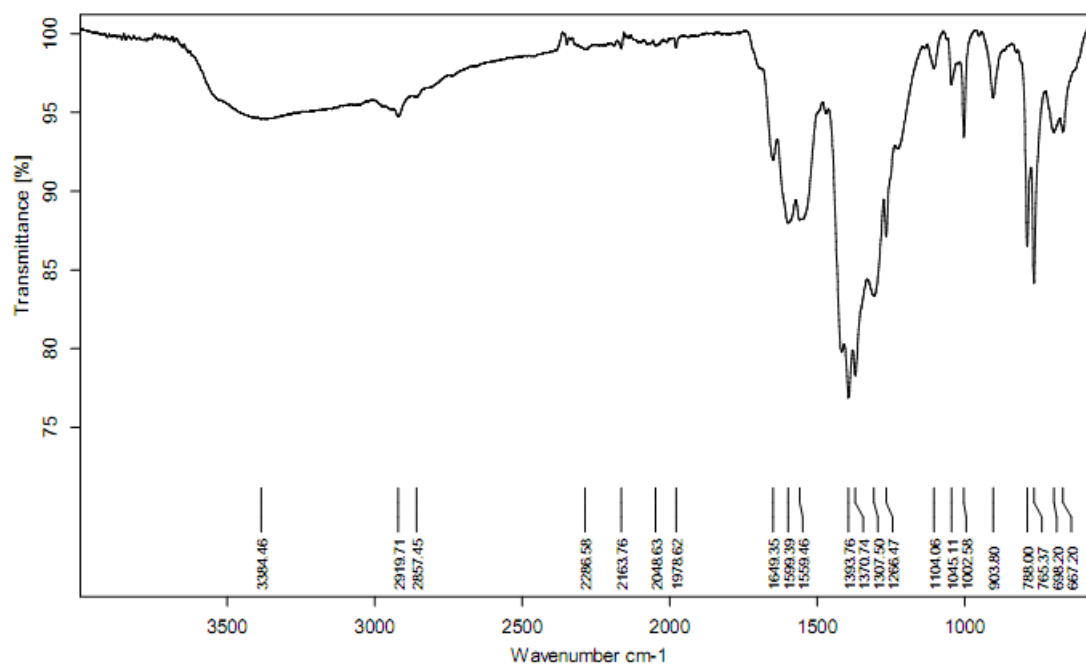

**Fig. S6** IR spectrum of  $[\text{Cu}_2(\text{Me}_4\text{BPDC})_2] \cdot 9 \text{ DMF}$ , **3** · 9 DMF (as synthesized).

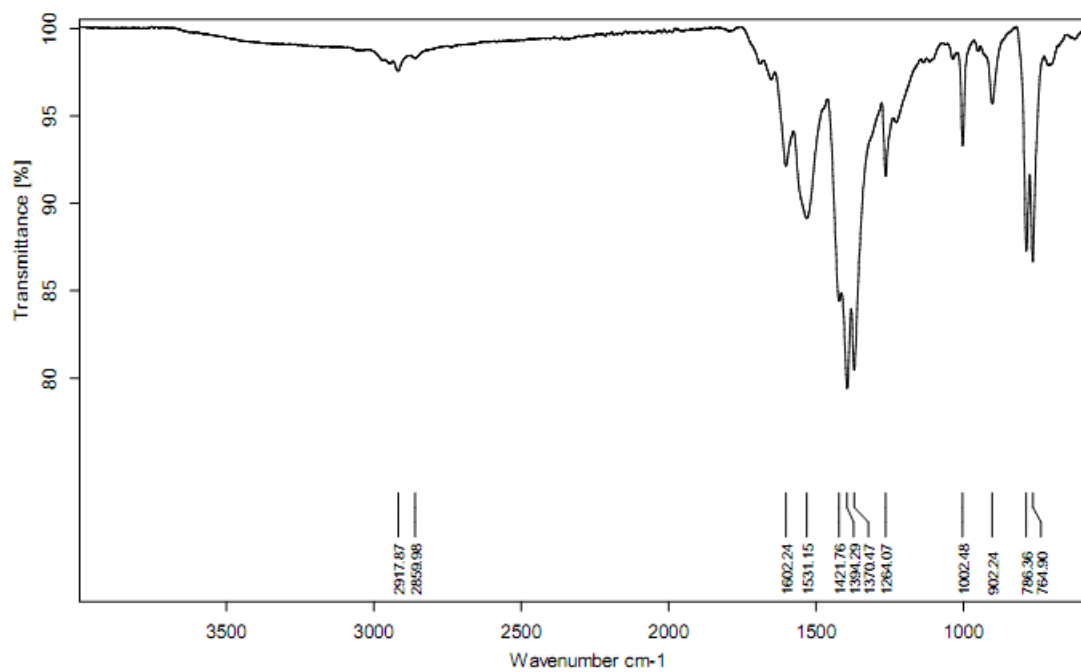

**Fig. S7** IR spectrum of  $[\text{Cu}_2(\text{Me}_4\text{BPDC})_2]$ , **3** (degassed).



**Table S2** Assignments of IR data for the as synthesized and activated samples **2** and **3**.

| <b>2 · 9 DMF</b> | <b>2</b>  | <b>3 · 9 DMF</b> | <b>3</b>   | <b>Assignments</b>                                                          |
|------------------|-----------|------------------|------------|-----------------------------------------------------------------------------|
| ~3300 (w, vbr)   |           | 3384 (w, vbr)    |            | $\nu$ N <sub>amide</sub> H DMF                                              |
| 2919 (vw)        | 2921 (vw) | 2920 (vw)        | 2918 (vvw) | w; $\nu$ C <sub>Ar</sub> H<br>w; $\nu$ C <sub>aliph</sub> H                 |
| 2861 (vw)        | 2861 (vw) | 2857 (vw)        | 2860 (vvw) |                                                                             |
| 1666 (m)         |           | 1649 (m)         |            | $\nu_{as}$ C=O [DMF]                                                        |
| 1601 (s)         | 1602 (s)  | 1599 (m)         | 1602 (m)   | $\nu_{as}$ CO <sub>2</sub> <sup>-</sup>                                     |
| 1559 (s)         | 1560 (s)  | 1559(m)          | 1531(m)    | $\nu_{as}$ CO <sub>2</sub> <sup>-</sup>                                     |
| 1423 (s)         | 1427 (s)  | 1422 (s)         | 1421 (s)   | $\nu$ Ph                                                                    |
| 1395 (s)         | 1399 (s)  | 1394 (vs)        | 1391 (s)   | $\nu_s$ CO <sub>2</sub> <sup>-</sup>                                        |
| 1371 (s)         | 1376 (s)  | 1371 (vs)        | 1370 (s)   | $\nu_s$ CO <sub>2</sub> <sup>-</sup> , $\nu$ CH<br>[(CH <sub>3</sub> )NCHO] |
|                  |           | 1308 (s)         |            |                                                                             |
| 1266 (m)         | 1268 (m)  | 1266 (m)         | 1266 (m)   | $\nu$ Ph(?)                                                                 |
| 1095 (w)         | -         | 1104 (w)         |            | DMF (?)                                                                     |
|                  |           | 1045 (m)         |            |                                                                             |
| 1003 (w)         | 1004 (w)  | 1002 (m)         | 1002 (m)   | $\gamma$ C <sub>Ar</sub> H, DMF                                             |
| 907 (w)          | 907 (w)   | 904 (w)          | 902 (w)    |                                                                             |
| 789 (s;          | 788 (s)   | 788(s)           | 786(s)     | $\gamma$ C <sub>Ar</sub> H                                                  |
| 760 (s;          | 759 (s)   | 765 (s)          | 762 (s)    | $\delta$ CO <sub>2</sub> <sup>-</sup>                                       |
| 663(vw)          | 629 (vw)  | 698 (m)          |            |                                                                             |
| 628 (vw)         |           | 667 (m)          |            |                                                                             |

$\nu$  - stretching;  $\delta$  - in-plane deformation;  $\gamma$  - out-of-plane deformation;

v - very; s - strong; m - medium; w - weak; sh - shoulder; br - broad;

subscripts: as - asymmetric; s - symmetric

The assignment was done according to [1].

- [1] H.T.Varghese, C.Y. Panicker, D. Philip, K. Sreevalsan, V. Anithakumary, Spectrochim. Acta Part A: Molec. Biomolec. Spectr. 68 (2007) 817-822.

### Pore size distribution according to DFT calculations (N<sub>2</sub> sorption data)

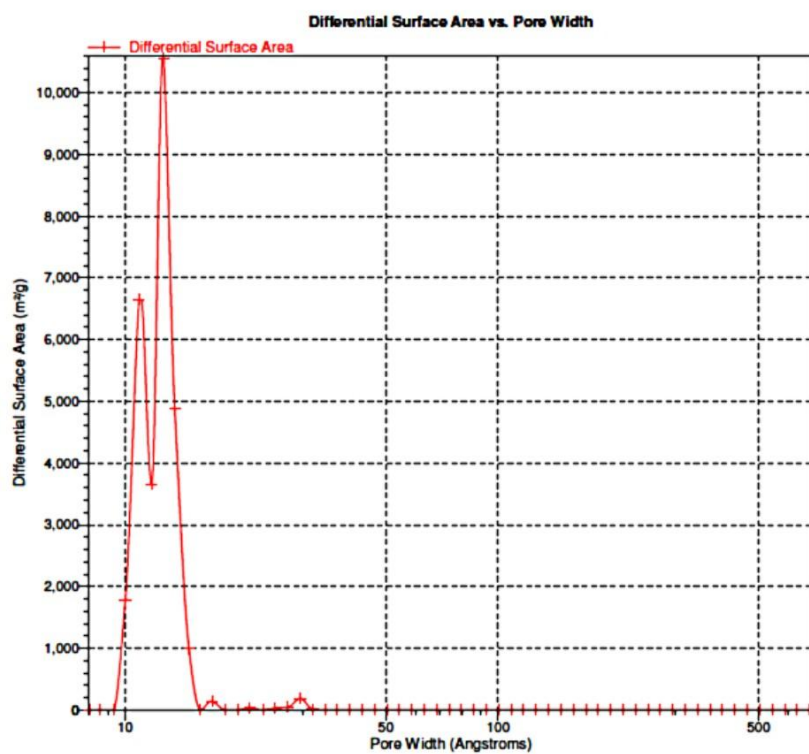

Fig. S8 DFT calculations for **2** (differential surface area (m<sup>2</sup> / g) versus pore width (Å))

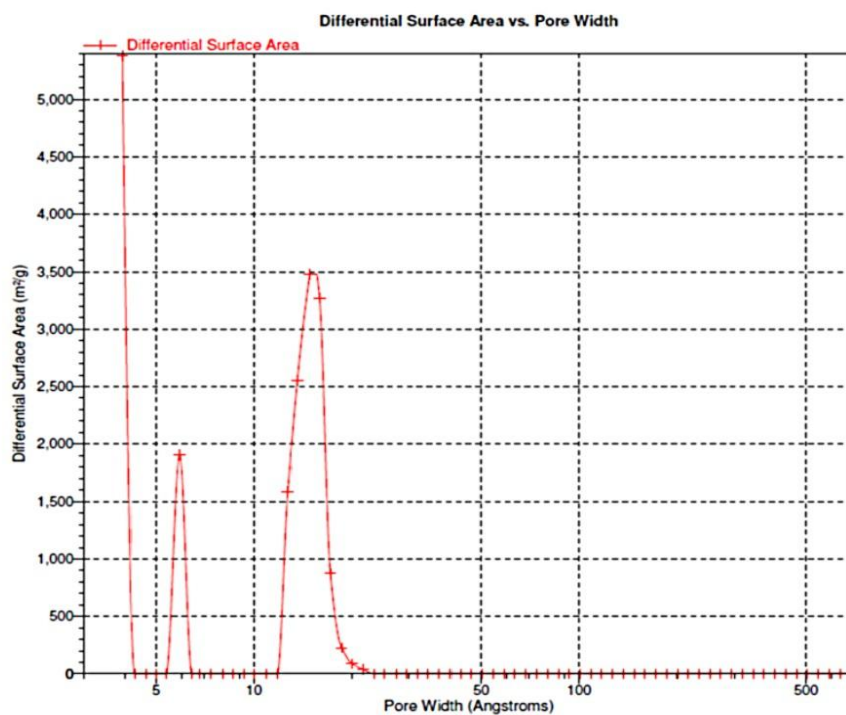

Fig. S9 DFT calculations for **3** (differential surface area (m<sup>2</sup> / g) versus pore width (Å))

## Powder X-ray diffraction patterns

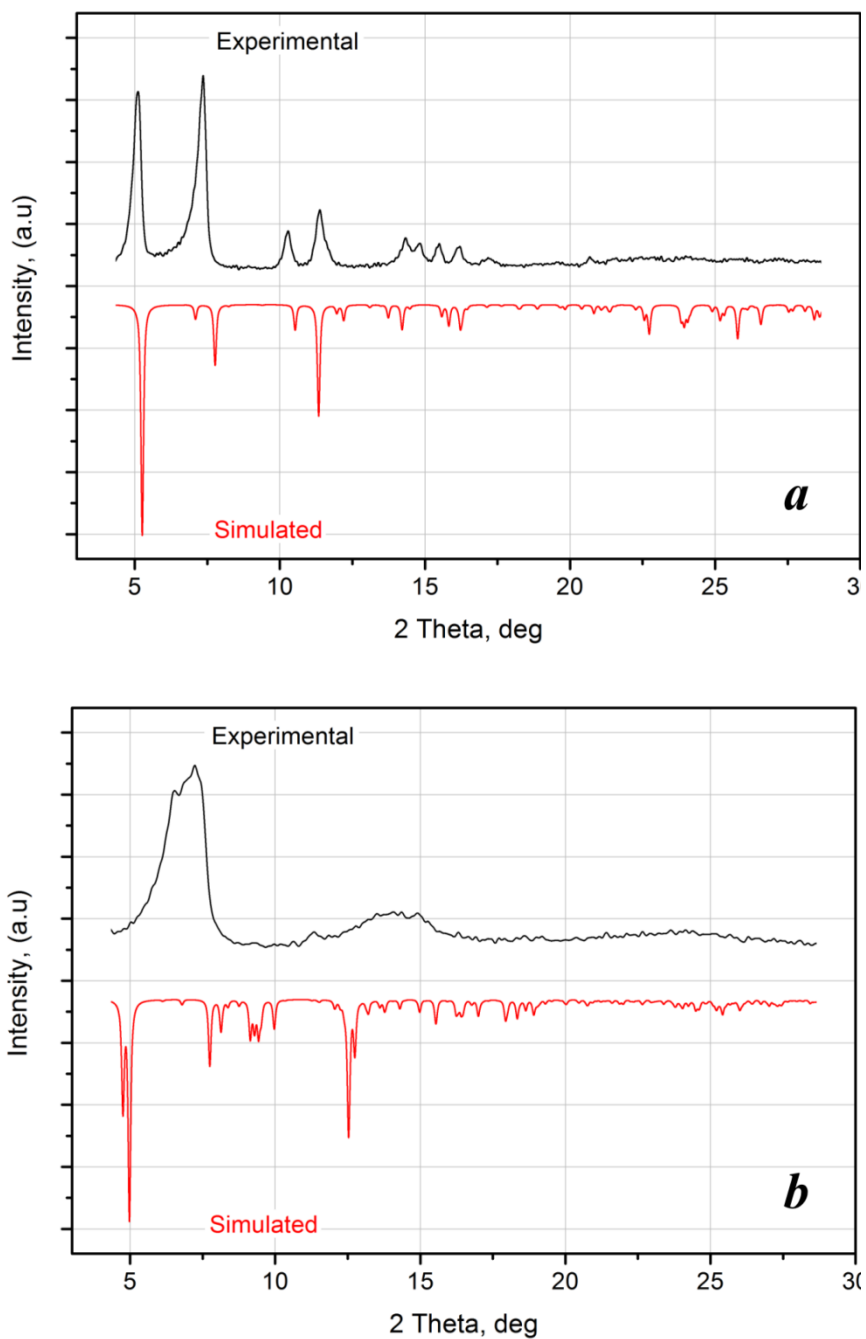

**Fig. S10** Powder X-ray diffraction patterns of **2** (a) and **3** (b) after degassing, compared with the simulated diffractogram based on the data of the single crystal XRD structural experiment (all the solvent atoms were removed prior to simulation).

**Approximate heat of adsorption (HoA) dependence on adsorbed quantities of CO<sub>2</sub> and CH<sub>4</sub> for 2 and 3<sup>I</sup>**

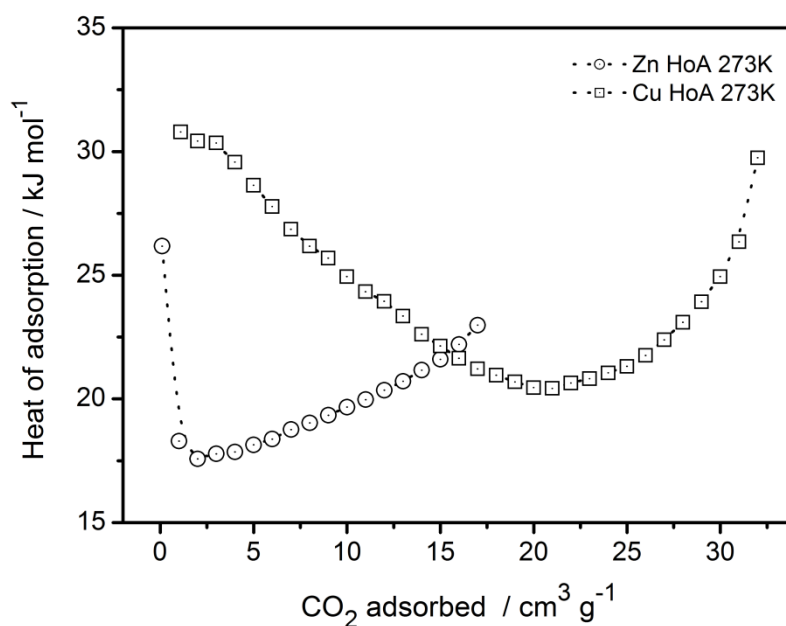

**Fig. S10** HoA of CO<sub>2</sub> for the samples 2 (Zn) and 3<sup>I</sup> (Cu), 273-293K.

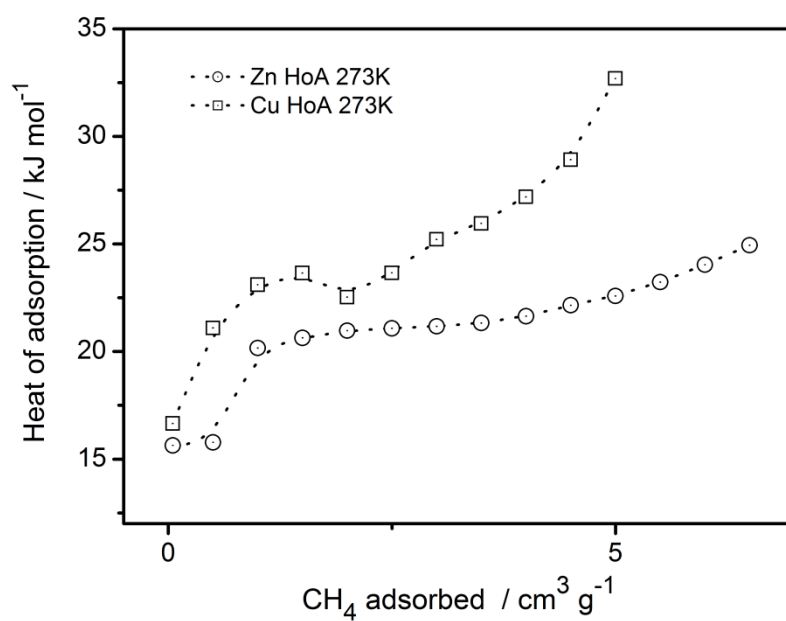

**Fig. S11** HoA of CH<sub>4</sub> for the samples 2 (Zn) and 3<sup>I</sup> (Cu), 273-293K.
